# Supplementary material
Source: publisher figshare collection journal article supplement (https://tandf.figshare.com/ndownloader/files/14702099)
Supplement: Supplementary file 1 [file 14702099]

## Adult roles and the gender gap in political knowledge: A comparative study

Monica Ferrín , *University of Coruña, Spain*

Marta Fraile , *CSIC and European University Institute, Italy*

Gema M. García-Albacete, *Universidad Carlos III de Madrid, Spain*

### Online Appendix

Table A1. List of knowledge items: Finland

| Order  | Correct (%) | Topic                                                                                          | Format | Content   |
|--------|-------------|------------------------------------------------------------------------------------------------|--------|-----------|
| c10_1* | 93.9        | Name of Prime Minister                                                                         | Open   | Classic   |
| c26*   | 93.5        | Meaning of TUPO <sup>1</sup>                                                                   | Closed | Economy   |
| c13*   | 86.1        | Maximum years between parliamentary elections                                                  | Closed | Democracy |
| c10_2* | 84.5        | Party of Prime Minister                                                                        | Open   | Classic   |
| c28*   | 84.1        | Length of term of President                                                                    | Closed | Democracy |
| c8*    | 79.8        | Maximum years between municipal elections                                                      | Closed | Democracy |
| c5*    | 79.5        | Who is elected in municipal elections                                                          | Closed | Democracy |
| c32    | 76.8        | Income tax                                                                                     | Closed | Economy   |
| c31    | 71.0        | Inflation                                                                                      | Closed | Economy   |
| c16*   | 69.8        | How many members in parliament                                                                 | Open   | Democracy |
| c17_2* | 69.4        | Party of Speaker of parliament                                                                 | Open   | Classic   |
| c19*   | 68.8        | Meaning of 'red earth/clay' <sup>2</sup>                                                       | Closed | Classic   |
| c25*   | 65.9        | Which parties in tripartite negotiations                                                       | Closed | Classic   |
| c17_1* | 65.6        | Name of Speaker of parliament                                                                  | Open   | Classic   |
| c22    | 65.2        | Main principle of division of duties between state and municipalities                          | Closed | Democracy |
| c9     | 62.4        | Who is elected in parliamentary elections                                                      | Closed | Democracy |
| c1     | 55.1        | Constitution: where are powers of the state vested                                             | Closed | Democracy |
| c15*   | 48.1        | Electoral system: how are votes transformed into seats                                         | Closed | Democracy |
| c2a    | 44.6        | Words associated with proportional representation I (multi-party system)                       | Closed | Democracy |
| c20    | 40.2        | Task of Prime Minister                                                                         | Closed | Democracy |
| c14*   | 40.1        | Year of next parliamentary elections                                                           | Open   | Democracy |
| c3     | 38.9        | Meaning of electoral division                                                                  | Closed | Democracy |
| c24    | 38.5        | Principle of parliamentarism (meaning)                                                         | Closed | Democracy |
| c12*   | 38.0        | Parties currently in government                                                                | Closed | Classic   |
| c2c    | 37.5        | Words associated with proportional representation II (several candidates in each constituency) | Closed | Democracy |
| c27*   | 35.4        | Who has competence in foreign policy                                                           | Closed | Policies  |
| c11    | 26.5        | Task of Parliament                                                                             | Closed | Democracy |
| c30    | 21.3        | How much is annual government spending                                                         | Closed | Economy   |
| c18    | 13.8        | Seats of parties in parliament                                                                 | Closed | Classic   |

\* Items that form part of the Mokken scale used in the main analyses

<sup>1</sup>TUPO refers to comprehensive national income policy agreements that were being discussed at the time of the interview (2008). <sup>2</sup> 'Red earth/clay' was a term used for the cooperation of two specific parties.

Table A2. List of knowledge items: Spain

| Order | Correct (%) | Topic                                                | Format      | Content   |
|-------|-------------|------------------------------------------------------|-------------|-----------|
| Q13*  | 93.9        | Logo PSOE                                            | Open        | Classic   |
| Q2*   | 93.5        | Words associated with democracy: vote                | Closed      | Democracy |
| Q1*   | 85.3        | Words associated with democracy: censorship          | Closed      | Democracy |
| Q7    | 84.4        | Maximum number of years between elections            | Closed      | Democracy |
| Q3*   | 84.0        | Words associated with democracy: demonstration       | Closed      | Democracy |
| Q27   | 83.9        | Who collects waste                                   | Closed      | Policies  |
| Q4*   | 82.4        | Words associated with democracy: violation of rights | Closed      | Democracy |
| Q14*  | 82.0        | Logo PP                                              | Open        | Classic   |
| Q29   | 79.5        | Where are health service cards obtained              | Closed      | Policies  |
| Q16*  | 79.1        | Party of Cospedal                                    | Closed      | Classic   |
| Q26   | 78.5        | Management of health centre                          | Closed      | Policies  |
| Q28   | 71.7        | Provision of ID card                                 | Closed      | Policies  |
| Q25   | 70.2        | Management of School/High school                     | Closed      | Policies  |
| Q5    | 69.4        | Function of Spanish Parliament                       | Closed      | Democracy |
| Q12*  | 62.9        | Office of Soraya Santamaria                          | Open        | Classic   |
| Q22   | 60.3        | What does the CPI measure                            | Closed      | Economy   |
| Q11   | 59.4        | Minister for Justice                                 | Open/closed | Classic   |
| Q20   | 59.1        | Percentage of unemployed                             | Open        | Economy   |
| Q30   | 57.9        | At what age does free public education start         | Open        | Policies  |
| Q9*   | 57.3        | Content: Spanish Constitution                        | Closed      | Democracy |
| Q6    | 56.8        | Who has the right to vote                            | Closed      | Democracy |
| Q18*  | 54.1        | Party of Rosa Díez                                   | Closed      | Classic   |
| Q23*  | 51.6        | Characteristics of a market economy                  | Closed      | Economy   |
| Q21   | 48.2        | Euribor value                                        | Closed      | Economy   |
| Q10   | 46.5        | Why should the government inform about activities    | Closed      | Democracy |
| Q15*  | 46.4        | Logo UGT                                             | Open        | Classic   |
| Q17*  | 45.9        | Party of Cayo Lara                                   | Closed      | Classic   |
| Q8    | 42.1        | Year of Spanish Constitution                         | Open/closed | Democracy |
| Q24   | 38.0        | Number of Autonomous Communities                     | Open/closed | Democracy |
| Q19*  | 21.5        | Party of Eduardo Madina                              | Closed      | Classic   |

\* Items that form part of the Mokken scale used in the main analyses

Table A.3  $H_i$  and  $Z$  coefficients of political knowledge scale and each item in Finland

| Item   | Score | $H_i$ | $Z$   |
|--------|-------|-------|-------|
| c10_1f | 0.94  | 0.54  | 26.71 |
| c26f   | 0.94  | 0.47  | 23.91 |
| c13f   | 0.86  | 0.38  | 26.99 |
| c10_2f | 0.85  | 0.49  | 36.31 |
| c28f   | 0.84  | 0.33  | 24.59 |
| c8f    | 0.80  | 0.39  | 31.07 |
| c5f    | 0.79  | 0.36  | 29.06 |
| c16f   | 0.70  | 0.41  | 35.06 |
| c17_2f | 0.69  | 0.47  | 40.89 |
| c19f   | 0.69  | 0.40  | 34.80 |
| c25f   | 0.66  | 0.39  | 32.93 |
| c17_1f | 0.66  | 0.45  | 38.34 |
| c12f   | 0.50  | 0.40  | 30.25 |
| c15f   | 0.48  | 0.35  | 25.60 |
| c14f   | 0.40  | 0.36  | 23.63 |
| c27f   | 0.35  | 0.43  | 26.45 |
| Scale  |       | 0.41  | 85.47 |

Exact wording of the questions:

*C5f* Political decisions are also made in municipalities in Finland. Which political decision-maker is elected by the residents of a municipality in municipal elections?

- In the judiciary
- In the people (CORRECT)
- In the President
- In the Government
- Can't say

*C8f* How often are municipal elections held in Finland?

- Every other year
- Every third year
- Every fourth year (CORRECT)
- Every fifth year
- Can't say

*C10\_1f* Who is currently the Prime Minister of Finland? OPEN-ENDED

*C10\_2f* Which party does the current Prime Minister of Finland represent? OPEN-ENDED

*C12f* Out of the following, please select the parties that currently form the Government (MULTIPLE CHOICE)

- KOK (CORRECT)

- SDP
- KESK (CORRECT)
- True Finns
- RKP (CORRECT)
- KD
- VIHR (CORRECT)
- VAS
- Can't say

*C13f* How often, at minimum, must parliamentary elections be held in Finland?

- Every three years
- Every four years (CORRECT)
- Every five years
- Every six years
- Can't say

*C14f* When will the parliamentary elections be held next? OPEN-ENDED

*C15f* The electoral system converts votes given in the elections into seats. In Finland, voters give their vote to the candidate of their choosing. What sort of influence does this vote given to a candidate have?

- The number of votes received by each candidate is counted and candidate with the most personal votes is elected
- The number of votes received by each candidate is counted and seats are allocated in order based on the personal votes
- Comparative index is calculated for each candidate based on votes received by party. Seats allocated based on the index (CORRECT)
- Each party receives seats based on the proportion of votes. Seats are filled in order of candidates on a list
- Can't say

*C16f* How many members are there in the Parliament? OPEN-ENDED

*C17\_1f* Who currently acts as the Speaker of the Parliament? OPEN-ENDED

*C17\_2f* Which party does the Speaker of the Parliament represent? OPEN-ENDED

*C19f* The cooperation of which two parties has been termed 'red earth/clay'?

- The social Democratic Party and National Coalition Party
- The social Democratic Party and the Centre Party (CORRECT)
- The Left Alliance and the Centre Party
- The Left Alliance and the National Coalition Party
- Can't say

*C25f* Since the 1960s, so-called tripartite negotiations have taken place in Finland. Who are the main parties in these negotiations?

- The President, the Prime Minister and the Minister of Finance

- The State, employer's organisations and trade unions/professional organizations (CORRECT)
- Municipal managers, town managers and executive directors of regional councils
- Finland, Sweden and Norway
- Can't say

*C26f* What is meant by the abbreviation TUPO?

- Plans that aim for the abolition of income tax
- An energy policy programme with an emphasis on wind power
- Comprehensive incomes policy settlement/ national income policy agreement (CORRECT)
- Income tax rate redress procedure
- Can't say

*C27f* The Constitution of Finland regulates the conduct of Finnish foreign policy. Which of the following alternatives completes the definition given in the Constitution: 'The foreign policy of Finland is directed by...'

- The President of the Republic, in co-operation with the Minister of Foreign Affairs
- The President of the Republic, in co-operation with the Government (CORRECT)
- The Parliament, in co-operation with the Minister for Foreign Affairs
- The Minister of Foreign Affairs
- Can't say

*C28f* How long is the term of the President of the Republic?

- Four years
- Five years
- Six years (CORRECT)
- Eight years
- Can't say

Table A.4  $H_i$  and  $Z$  coefficients of political knowledge scale and each item in Spain

| Item      | Score | $H_i$   | $Z$    |
|-----------|-------|---------|--------|
| correct13 | 0.94  | 0.47    | 35.84  |
| correct2  | 0.94  | 0.45    | 34.62  |
| correct1  | 0.86  | 0.37    | 40.19  |
| correct3  | 0.85  | 0.33    | 36.59  |
| correct14 | 0.83  | 0.38    | 43.27  |
| correct4  | 0.83  | 0.31    | 35.87  |
| correct16 | 0.79  | 0.44    | 50.88  |
| correct12 | 0.62  | 0.44    | 55.61  |
| correct9  | 0.59  | 0.33    | 41.66  |
| correct18 | 0.54  | 0.48    | 60.91  |
| correct23 | 0.53  | 0.34    | 42.23  |
| correct15 | 0.48  | 0.34    | 40.93  |
| correct17 | 0.45  | 0.46    | 53.46  |
| correct19 | 0.21  | 0.52    | 37.21  |
| Scale     |       | 0.39799 | 115.56 |

Exact wording of the questions:

*Correct 1:* Now I am going to ask you some questions about the way democracy works: Please tell me, which of the following words define a democratic system and which define a dictatorship? Censorship

*Correct 2:* Now I am going to ask you some questions about the way democracy works: Please tell me, which of the following words define a democratic system and which define a dictatorship? Vote

*Correct 3:* Now I am going to ask you some questions about the way democracy works: Please tell me, which of the following words define a democratic system and which define a dictatorship? Demonstrations

*Correct 4:* Now I am going to ask you some questions about the way democracy works: Please tell me, which of the following words define a democratic system and which define a dictatorship? Violation of human rights

*Correct 9:* Which of the following statements are included in the Spanish Constitution?

- Statements about current relations of Spain with other countries..... 1
- Statements from the current Prime Minister ..... 2
- Statements of the principles that govern the political system and the laws ..... 3
- (CORRECT)
- Statements of political parties to their sympathizers..... 4
- D.K..... 8
- N. A..... 9

*Correct 12* Do you remember the office hold by Soraya Sáenz de Santamaría?

- Correct..... 1
- Incorrect..... 2
- D.K..... 8
- N. A..... 9

Correct answer: Vice-President of the Government, Minister of Presidency, or Government's spokeswomen, the three responses were codified as correct by the interviewers (Soraya Sáenz de Santamaría held these three offices, something which is usual in Spain for the vice-president of the government). Soraya Sáenz de Santamaría is a relevant political actor of the incumbent government.

*Correct 13:* Could you relate these symbols with a given trade union or political party?

Logo PSOE

*Correct 14:* Could you relate these symbols with a given trade union or political party?

Logo PP

*Correct 15:* Could you relate these symbols with a given trade union or political party?

Logo UGT

Note: The respondent is faced with three different symbols. The pictures represent respectively the logo of PSOE (social-democrats, at the time of the interview the main opposition party), PP (the incumbent conservative party at the time of the interview) and UGT (one of the two main national trade unions in Spain). The correct answers were codified by the interviewers and correspond to the logo indicated in each question.

*Correct 16:* Please associate the following political leaders with their corresponding political party (PP; IU; UPyD; PNV; CiU; Other parties) – M<sup>a</sup> Dolores de Cospedal (PP)

*Correct 17:* Please associate the following political leaders with their corresponding political party (PP; IU; UPyD; PNV; CiU; Other parties) – Cayo Lara (IU)

*Correct 18:* Please associate the following political leaders with their corresponding political party (PP; IU; UPyD; PNV; CiU; Other parties) – Rosa Díaz (UPyD)

*Correct 19:* Please associate the following political leaders with their corresponding political party (PP; IU; UPyD; PNV; CiU; Other parties) – Eduardo Madina (PSOE)

Note: The pictures of four political actors (two women and two men) were showed to the respondents: M<sup>a</sup> Dolores de Cospedal (PP, the incumbent party at the time of the interview), Rosa Diez (UPyD, a liberal party in the opposition at the time of the interview), Eduardo Madina (PSOE, social-democrats, at the time of the interview the main opposition party) and Cayo Lara (IU, United Left, in the opposition at the time of the interview). They all constitute prominent political figures of the incumbent's government and different opposition parties. For each figure, the respondent had to choose among the six proposed parties.

*Correct 23:* Which of the following defines the main (most relevant) characteristic of a market economy?

- The duty to belong to a Trade Union..... 1
- The total regulation of the economy..... 2
- Free competition among companies in the market..... 3 (CORRECT)
- The duty to pay taxes..... 4
- (DO NOT READ) Does not know what a market economy is.. 5
- D.K..... 8
- N.A ..... 9



Table A5. Replication of main analyses presented in Table 2 with classic items as the dependent variable (Finland)

|                          | Model 1              | Model 2             | Model 3             | Model 4             |
|--------------------------|----------------------|---------------------|---------------------|---------------------|
| Education                | 4.884***<br>(0.600)  | 4.940***<br>(0.599) | 4.874***<br>(0.599) | 4.825***<br>(0.601) |
| Age                      | 1.184***<br>(0.188)  | 1.200***<br>(0.187) | 1.207***<br>(0.188) | 1.183***<br>(0.188) |
| Female                   | -9.818***<br>(2.411) | -4.147<br>(3.851)   | -5.932<br>(3.807)   | -7.003**<br>(3.279) |
| Politicized family       | 2.865<br>(2.452)     | 2.832<br>(2.445)    | 2.901<br>(2.450)    | 2.790<br>(2.451)    |
| Lives with partner       | 2.735<br>(2.950)     | 7.412*<br>(3.848)   | 2.106<br>(2.985)    | 2.709<br>(2.948)    |
| In paid employment       | -1.130<br>(2.619)    | -1.795<br>(2.635)   | 2.310<br>(3.696)    | -1.193<br>(2.618)   |
| Has a child              | -6.597**<br>(2.816)  | -6.514**<br>(2.808) | -6.469**<br>(2.816) | -3.306<br>(3.832)   |
| Female # partner         |                      | -9.140*<br>(4.851)  |                     |                     |
| Female # paid employment |                      |                     | -6.365<br>(4.830)   |                     |
| Female # child           |                      |                     |                     | -6.055<br>(4.785)   |
| Constant                 | 4.599<br>(5.761)     | 1.480<br>(5.977)    | 2.080<br>(6.065)    | 3.805<br>(5.791)    |
| Observations             | 428                  | 428                 | 428                 | 428                 |
| R-squared                | 0.275                | 0.281               | 0.278               | 0.278               |

OLS regression coefficients. Standard errors in parentheses. \*\*\* p<0.01, \*\* p<0.05, \* p<0.1

Table A6. Replication of main analyses presented in Table 3 with classic items as the dependent variable (Spain)

|                          | Model 1              | Model 2              | Model 3              | Model 4              |
|--------------------------|----------------------|----------------------|----------------------|----------------------|
| Education                | 5.930***<br>(0.347)  | 5.917***<br>(0.347)  | 5.925***<br>(0.347)  | 5.900***<br>(0.347)  |
| Age                      | 0.893***<br>(0.0926) | 0.898***<br>(0.0927) | 0.893***<br>(0.0926) | 0.905***<br>(0.0926) |
| Female                   | -9.079***<br>(1.143) | -7.063***<br>(1.712) | -7.177***<br>(1.703) | -6.694***<br>(1.512) |
| Politicized family       | 7.457***<br>(1.199)  | 7.362***<br>(1.200)  | 7.421***<br>(1.199)  | 7.381***<br>(1.198)  |
| Lives with partner       | 2.493*<br>(1.442)    | 4.297**<br>(1.838)   | 2.461*<br>(1.441)    | 2.096<br>(1.449)     |
| In paid employment       | 3.292***<br>(1.193)  | 3.221***<br>(1.194)  | 4.979***<br>(1.637)  | 3.176***<br>(1.193)  |
| Has a child              | -4.329***<br>(1.489) | -4.547***<br>(1.495) | -4.415***<br>(1.490) | -1.428<br>(1.915)    |
| Female # partner         |                      | -3.581<br>(2.264)    |                      |                      |
| Female # paid employment |                      |                      | -3.395<br>(2.256)    |                      |
| Female # child           |                      |                      |                      | -5.515**<br>(2.292)  |
| Constant                 | 8.627***<br>(2.876)  | 7.699***<br>(2.934)  | 7.710***<br>(2.939)  | 7.578***<br>(2.905)  |
| Observations             | 1,682                | 1,682                | 1,682                | 1,682                |
| R-squared                | 0.300                | 0.301                | 0.301                | 0.303                |

OLS regression coefficients. Standard errors in parentheses. \*\*\* p<0.01, \*\* p<0.05, \* p<0.1

Table A7. Descriptive statistics

**Finland (full sample)**

| Variable            | Obs  | Mean  | Std. Dev. | Min | Max |
|---------------------|------|-------|-----------|-----|-----|
| Political Knowledge | 1020 | 69.66 | 22.90     | 0   | 100 |
| Education           | 1019 | 3.91  | 2.26      | 1   | 9   |
| Age                 | 1020 | 48.96 | 17.75     | 18  | 91  |
| Female              | 1020 | 0.50  | 0.50      | 0   | 1   |
| Lives with partner  | 1020 | 0.77  | 0.42      | 0   | 1   |
| Paid employment     | 1020 | 0.49  | 0.50      | 0   | 1   |
| Has one child       | 1020 | 0.33  | 0.47      | 0   | 1   |
| Politicized family  | 1017 | 0.34  | 0.47      | 0   | 1   |

**Spain (full sample)**

| Variable            | Obs  | Mean  | Std. Dev. | Min | Max |
|---------------------|------|-------|-----------|-----|-----|
| Political Knowledge | 2964 | 67.38 | 22.12     | 0   | 100 |
| Education           | 2958 | 3.27  | 1.94      | 0   | 6   |
| Age                 | 2962 | 44.27 | 17.08     | 18  | 96  |
| Female              | 2962 | 0.50  | 0.50      | 0   | 1   |
| Lives with partner  | 2958 | 0.62  | 0.48      | 0   | 1   |
| Paid employment     | 2964 | 0.46  | 0.50      | 0   | 1   |
| Has one child       | 2964 | 0.45  | 0.50      | 0   | 1   |
| Politicized family  | 2833 | 0.30  | 0.46      | 0   | 1   |

**Finland (sample 18 to 44)**

| Variable            | Obs | Mean  | Std. Dev. | Min | Max |
|---------------------|-----|-------|-----------|-----|-----|
| Political Knowledge | 428 | 62.43 | 23.90     | 0   | 100 |
| Education           | 428 | 4.53  | 1.99      | 1   | 9   |
| Age                 | 428 | 31.28 | 7.19      | 18  | 44  |
| Female              | 428 | 0.53  | 0.50      | 0   | 1   |
| Lives with partner  | 428 | 0.63  | 0.48      | 0   | 1   |
| Paid employment     | 428 | 0.61  | 0.49      | 0   | 1   |
| Has one child       | 428 | 0.48  | 0.50      | 0   | 1   |
| Politicized family  | 428 | 0.38  | 0.49      | 0   | 1   |

**Spain (sample 18 to 44)**

| Variable            | Obs  | Mean  | Std. Dev. | Min | Max |
|---------------------|------|-------|-----------|-----|-----|
| Political Knowledge | 1746 | 68.50 | 21.35     | 0   | 100 |
| Education           | 1745 | 3.82  | 1.72      | 0   | 6   |
| Age                 | 1746 | 32.31 | 7.42      | 18  | 44  |
| Female              | 1746 | 0.49  | 0.50      | 0   | 1   |
| Lives with partner  | 1744 | 0.55  | 0.50      | 0   | 1   |
| Paid employment     | 1746 | 0.56  | 0.50      | 0   | 1   |
| Has one child       | 1746 | 0.43  | 0.49      | 0   | 1   |
| Politicized family  | 1685 | 0.36  | 0.48      | 0   | 1   |

Table A8. Levels of political knowledge in Finland and Spain by age and for men and women

|                                                                | Finland            | Spain              |
|----------------------------------------------------------------|--------------------|--------------------|
| Education                                                      | 3.64***<br>(0.28)  | 4.90***<br>(0.20)  |
| Politicized family                                             | 4.69***<br>(1.29)  | 5.62***<br>(0.80)  |
| Women                                                          | 2.63<br>(9.31)     | 1.44<br>(5.11)     |
| Age                                                            | 1.93***<br>(0.29)  | 1.73***<br>(0.16)  |
| Age <sup>2</sup>                                               | -0.01***<br>(0.00) | -0.02***<br>(0.00) |
| Women * Age                                                    | -0.39<br>(0.40)    | -0.32<br>(0.22)    |
| Women * Age <sup>2</sup>                                       | 0.00<br>(0.00)     | 0.00<br>(0.00)     |
| Constant                                                       | 1.22<br>(6.85)     | 12.10***<br>(3.68) |
| Observations                                                   | 1,016              | 2,829              |
| R-squared                                                      | 0.31               | 0.32               |
| Standard errors in parentheses. *** p<0.01, ** p<0.05, * p<0.1 |                    |                    |

Table A9. Replication of Table 2 for the whole sample (including &gt;44): Finland

|                          | Model 1              | Model 2              | Model 3              | Model 4              |
|--------------------------|----------------------|----------------------|----------------------|----------------------|
| Education                | 3.679***<br>(0.281)  | 3.670***<br>(0.280)  | 3.683***<br>(0.281)  | 3.682***<br>(0.281)  |
| Age                      | 1.718***<br>(0.221)  | 1.748***<br>(0.220)  | 1.725***<br>(0.222)  | 1.700***<br>(0.221)  |
| Age <sup>2</sup>         | -0.013***<br>(0.002) | -0.013***<br>(0.002) | -0.013***<br>(0.002) | -0.012***<br>(0.002) |
| Female                   | -8.491***<br>(1.204) | -1.243<br>(2.519)    | -7.961***<br>(1.676) | -6.525***<br>(1.459) |
| Politicized family       | 4.355***<br>(1.284)  | 4.419***<br>(1.278)  | 4.341***<br>(1.285)  | 4.188***<br>(1.283)  |
| Lives with partner       | 1.489<br>(1.652)     | 6.042***<br>(2.154)  | 1.452<br>(1.655)     | 1.390<br>(1.649)     |
| In paid employment       | 0.984<br>(1.427)     | 0.782<br>(1.422)     | 1.522<br>(1.854)     | 0.764<br>(1.427)     |
| Has a child              | -3.249**<br>(1.491)  | -3.482**<br>(1.486)  | -3.264**<br>(1.492)  | 0.0261<br>(2.029)    |
| Female # partner         |                      | -9.335***<br>(2.855) |                      |                      |
| Female # paid employment |                      |                      | -1.093<br>(2.405)    |                      |
| Female # child           |                      |                      |                      | -6.126**<br>(2.583)  |
| Constant                 | 7.405<br>(4.880)     | 3.612<br>(4.993)     | 6.997<br>(4.964)     | 7.300<br>(4.869)     |
| Observations             | 1,016                | 1,016                | 1,016                | 1,016                |
| R-squared                | 0.309                | 0.316                | 0.309                | 0.312                |

OLS coefficients. Standard errors in parentheses. \*\*\* p<0.01, \*\* p<0.05, \* p<0.1

Table A10. Replication of Table 3 for the whole sample (including &gt;44): Spain

|                          | Model 1              | Model 2              | Model 3              | Model 4              |
|--------------------------|----------------------|----------------------|----------------------|----------------------|
| Education                | 4.806***<br>(0.205)  | 4.776***<br>(0.204)  | 4.809***<br>(0.205)  | 4.796***<br>(0.205)  |
| Age                      | 1.470***<br>(0.128)  | 1.498***<br>(0.128)  | 1.468***<br>(0.128)  | 1.484***<br>(0.128)  |
| Female                   | -0.013***<br>(0.001) | -0.014***<br>(0.001) | -0.013***<br>(0.001) | -0.013***<br>(0.001) |
| Politicized family       | -7.060***<br>(0.687) | -4.147***<br>(1.129) | -6.838***<br>(0.937) | -6.023***<br>(0.929) |
| Lives with partner       | 5.759***<br>(0.779)  | 5.728***<br>(0.778)  | 5.761***<br>(0.779)  | 5.739***<br>(0.779)  |
| In paid employment       | 1.929**<br>(0.836)   | 4.392***<br>(1.128)  | 1.932**<br>(0.836)   | 1.814**<br>(0.838)   |
| Has a child              | 2.598***<br>(0.769)  | 2.452***<br>(0.769)  | 2.835***<br>(1.026)  | 2.513***<br>(0.771)  |
| Female # partner         |                      | -4.629***<br>(1.426) |                      |                      |
| Female # paid employment |                      |                      | -0.479<br>(1.374)    |                      |
| Female # child           |                      |                      |                      | -2.297*<br>(1.385)   |
| Constant                 | 17.202***<br>(2.708) | 15.581***<br>(2.749) | 17.111***<br>(2.721) | 16.625***<br>(2.730) |
| Observations             | 2,823                | 2,823                | 2,823                | 2,823                |
| R-squared                | 0.321                | 0.323                | 0.321                | 0.321                |

OLS coefficients. Standard errors in parentheses. \*\*\* p<0.01, \*\* p<0.05, \* p<0.1

Table A11. Replication of models in Table 2 with additional control variables. Finland

|                                    | Model 1              | Model 2              | Model 3              | Model 4              |
|------------------------------------|----------------------|----------------------|----------------------|----------------------|
| Education                          | 3.625***<br>(0.480)  | 3.652***<br>(0.481)  | 3.619***<br>(0.480)  | 3.611***<br>(0.481)  |
| Age                                | 0.778***<br>(0.148)  | 0.786***<br>(0.148)  | 0.791***<br>(0.148)  | 0.779***<br>(0.148)  |
| Female                             | -4.855***<br>(1.869) | -3.047<br>(2.973)    | -2.418<br>(2.950)    | -4.109<br>(2.530)    |
| Lives with partner                 | 3.625***<br>(0.480)  | 3.652***<br>(0.481)  | 3.619***<br>(0.480)  | 3.611***<br>(0.481)  |
| Has paid employment                | -2.757<br>(2.064)    | -2.966<br>(2.082)    | -0.584<br>(2.898)    | -2.772<br>(2.066)    |
| Has a child                        | -4.081*<br>(2.176)   | -4.063*<br>(2.177)   | -4.003*<br>(2.177)   | -3.193<br>(2.976)    |
| Interest in politics               | 8.353***<br>(1.309)  | 8.255***<br>(1.315)  | 8.397***<br>(1.309)  | 8.308***<br>(1.314)  |
| Political information (TV)         | 1.904**<br>(0.840)   | 1.918**<br>(0.840)   | 1.870**<br>(0.840)   | 1.926**<br>(0.842)   |
| Political information (Radio)      | 0.657<br>(0.707)     | 0.634<br>(0.708)     | 0.655<br>(0.707)     | 0.633<br>(0.710)     |
| Political information (Newspapers) | 2.832***<br>(0.982)  | 2.778***<br>(0.985)  | 2.858***<br>(0.982)  | 2.800***<br>(0.986)  |
| Politicized family                 | -0.792<br>(1.947)    | -0.761<br>(1.948)    | -0.769<br>(1.946)    | -0.794<br>(1.948)    |
| Female * partner                   |                      | -2.952<br>(3.776)    |                      |                      |
| Female * paid employment           |                      |                      | -3.973<br>(3.722)    |                      |
| Female * child                     |                      |                      |                      | -1.632<br>(3.728)    |
| Constant                           | -16.42***<br>(5.639) | -17.08***<br>(5.704) | -18.08***<br>(5.848) | -16.46***<br>(5.645) |
| Observations                       | 427                  | 427                  | 427                  | 427                  |
| R-squared                          | 0.424                | 0.425                | 0.425                | 0.424                |

OLS coefficients. Standard errors in parentheses. \*\*\* p<0.01, \*\* p<0.05, \* p<0.1

Table A12. Replication models in Table 3 with additional control variables. Spain.

|                                    | Model 1              | Model 2              | Model 3              | Model 4              |
|------------------------------------|----------------------|----------------------|----------------------|----------------------|
| Education                          | 3.587***<br>(0.268)  | 3.584***<br>(0.268)  | 3.587***<br>(0.268)  | 3.580***<br>(0.268)  |
| Age                                | 0.468***<br>(0.0678) | 0.473***<br>(0.0678) | 0.468***<br>(0.0678) | 0.476***<br>(0.0679) |
| Female                             | -3.887***<br>(0.842) | -2.222*<br>(1.241)   | -3.709***<br>(1.239) | -2.572**<br>(1.100)  |
| Lives with partner                 | 1.609<br>(1.049)     | 3.102**<br>(1.330)   | 1.605<br>(1.050)     | 1.375<br>(1.056)     |
| Has paid employment                | 2.674***<br>(0.876)  | 2.629***<br>(0.875)  | 2.833**<br>(1.193)   | 2.619***<br>(0.875)  |
| Has a child                        | -1.931*<br>(1.081)   | -2.106*<br>(1.084)   | -1.938*<br>(1.082)   | -0.313<br>(1.388)    |
| Interest in politics               | 5.509***<br>(0.510)  | 5.493***<br>(0.510)  | 5.504***<br>(0.511)  | 5.500***<br>(0.510)  |
| Political information (TV)         | 1.433***<br>(0.369)  | 1.478***<br>(0.370)  | 1.436***<br>(0.370)  | 1.453***<br>(0.369)  |
| Political information (Radio)      | 0.432*<br>(0.257)    | 0.410<br>(0.257)     | 0.431*<br>(0.257)    | 0.428*<br>(0.257)    |
| Political information (Newspapers) | 1.536***<br>(0.274)  | 1.521***<br>(0.274)  | 1.538***<br>(0.274)  | 1.509***<br>(0.274)  |
| Politicized family                 | 2.447***<br>(0.906)  | 2.377***<br>(0.906)  | 2.445***<br>(0.906)  | 2.421***<br>(0.905)  |
| Female * partner                   |                      | -2.991*<br>(1.639)   |                      |                      |
| Female * paid employment           |                      |                      | -0.319<br>(1.632)    |                      |
| Female * child                     |                      |                      | -0.319               | -3.076*<br>(1.658)   |
| Constant                           | 24.93***<br>(2.271)  | 24.04***<br>(2.321)  | 24.84***<br>(2.323)  | 24.29***<br>(2.295)  |
| Observations                       | 1,669                | 1,669                | 1,669                | 1,669                |
| R-squared                          | 0.401                | 0.402                | 0.401                | 0.402                |

OLS coefficients. Standard errors in parentheses.
